# Supplementary figures and images for: When single-host parasites become multi-host?
Source: Research Square preprint supplement (doi:10.21203/rs.3.rs-3204318/v1), 2023-08-17

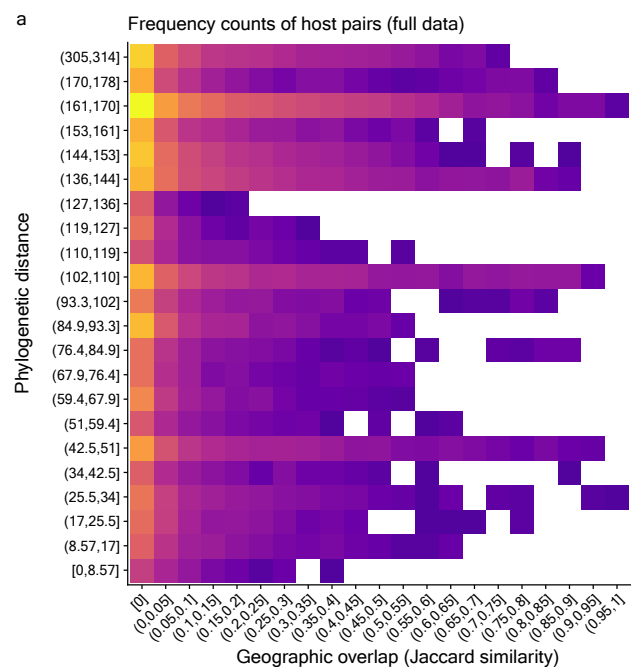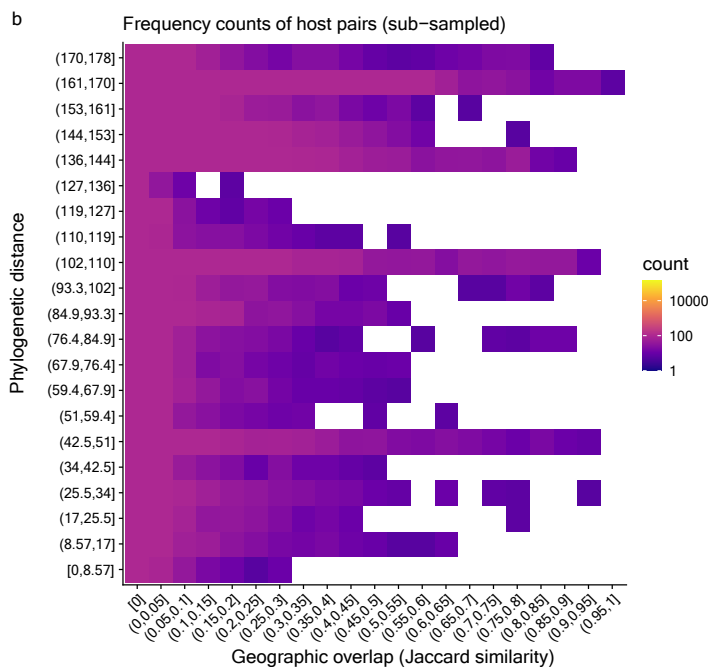

Supplement: Supplementary file 1 [file 4f504f27b91350b192822470.pdf]
